# Supplementary material for: Inactivation of Yes-Associated Protein Mediates Trophoblast Dysfunction: A New Mechanism of Pregnancy Loss Associated with Anti-Phospholipid Antibodies?
Source: MDPI journal article supplement (doi:10.3390/biomedicines10123296), 2022-12-19
Supplement: s1 [file s1]

**Table S1.** Clinical and laboratory features of healthy women and aPL women carriers.

| Healthy Women   | Age | aCL IgG (GPLU/mL)   | a $\beta$ 2GPI IgG (AU/mL)   | Clinical Features                                                  |
|-----------------|-----|---------------------|------------------------------|--------------------------------------------------------------------|
| 1               | 34  | –                   | –                            | Gestation 22week                                                   |
| 2               | 31  | –                   | –                            | Gestation 16week                                                   |
| 3               | 30  | –                   | –                            | Gestation 11week+1day                                              |
| 4               | 28  | –                   | –                            | Non-pregnancy                                                      |
| 5               | 29  | –                   | –                            | Non-pregnancy                                                      |
| 6               | 26  | –                   | –                            | Non-pregnancy                                                      |
| aPL Carriers    | Age | aCL IgG (GPLU/mL) ¶ | a $\beta$ 2GPI IgG (AU/mL) ¶ | Clinical Features                                                  |
| 1 <sup>†</sup>  | 33  | 13.9                | –                            | Gestation 23 week, threatened abortion<br>early embryo retardation |
| 2               | 29  | 90.4                | –                            | Gestation 17 week, spontaneous pregnancy loss                      |
| 3               | 33  | 53.3                | 36.4                         | Gestation 10 week+3 days, Recurrent pregnancy loss                 |
| 4               | 32  | 68                  | 76.4                         | Spontaneous pregnancy loss, Cornual pregnancy, Infertility         |
| 5               | 30  | 42.7                | 98                           | Spontaneous pregnancy loss, Induced labor (fetal anomaly)          |
| 6               | 26  | 19.8                | –                            | Recurrent pregnancy loss                                           |
| 7 <sup>††</sup> | 36  | >120                | 168                          | Sjogren syndrome, Recurrent pregnancy loss                         |
| 8               | 29  | 29.3                | –                            | Spontaneous pregnancy loss, Infertility                            |

†: Carrier 1 positive for aCL IgG and anti- $\beta$ 2GPI IgM/IgA more than 4 times overall this gestation.

††: Carrier 7 also positive for LAC. ¶: This table only showed one of several serum test results of aPL although patients were detected consecutively positive for aPL at different times.

aCL, anti-cardiolipin antibodies; a $\beta$ 2GPI, anti- $\beta$ 2-glycoprotein I antibodies; –: negative; GPLU&AU: The aCL IgG and anti- $\beta$ 2GPI antibodies activity were measured by chemiluminescent immunoassay (CLIA) in our hospital clinical laboratory, in IgG phospholipid units (GPLU) for the CL assay and arbitrary units (AU) for the anti- $\beta$ 2GPI assay (an in-house standard of a patient with positive anti- $\beta$ 2GPI).

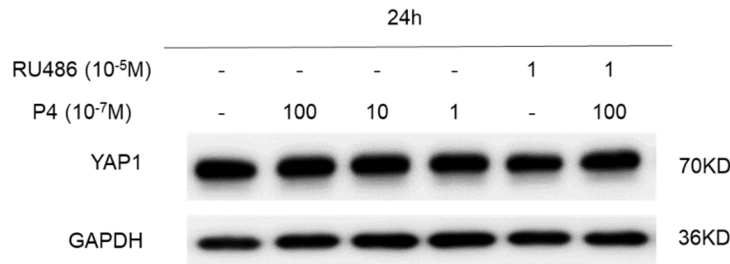

**Figure S1.** Progesterone treatment for 24 h has no effect on YAP protein expression in vitro. HTR-8 cells were treated with control vehicle (DMSO) or progesterone (P<sub>4</sub>) ( $10^{-7}$  to  $10^{-5}$ M), alone or in combination with RU486 ( $10^{-5}$ M) for 24h. The YAP protein level was analyzed by immunoblotting 24 h after progesterone stimulation. There was no significant change of YAP protein expression. Representative picture of repeated independent experiments was shown.

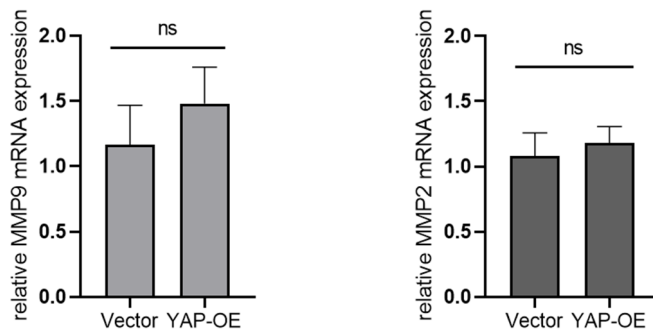

**Figure S2.** YAP overexpression does not alter the mRNA expression of MMP2 or MMP9. The mRNA levels of MMP2 and MMP9 were quantified by RT-qPCR in cells overexpressed with YAP protein. All values in were presented as the mean $\pm$  SEM. Student's t test; ns indicates no significance.
